# Supplementary material for: Cd-doped Ag2O/BiVO4 visible light Z-scheme photocatalyst for efficient ciprofloxacin degradation
Source: Royal Society of Chemistry journal article supplement (doi:10.1039/d2ra07200a), 2022-01-01
Supplement: d2ra07200a1.pdf [file d2ra07200a1.pdf]

## Supporting Information (SI)

### Cd-doped $\text{Ag}_2\text{O}/\text{BiVO}_4$ visible light Z-scheme photocatalyst for efficient ciprofloxacin degradation

by

Arup Kumar De, Uttam Kumar, Neha Jatav, and Indrajit Sinha\*

Department of Chemistry,

Indian Institute of Technology (Banaras Hindu University), Varanasi 221005, India

\*Corresponding author email: [isinha.apc@iitbhu.ac.in](mailto:isinha.apc@iitbhu.ac.in)

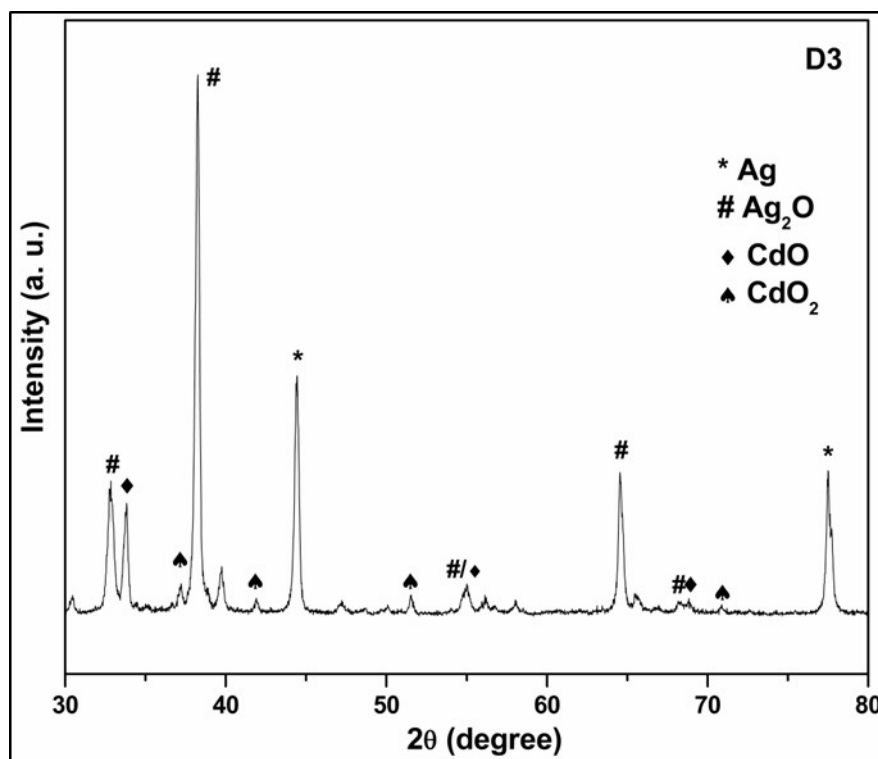

**Figure S1.** Powder XRD pattern of D3 sample.

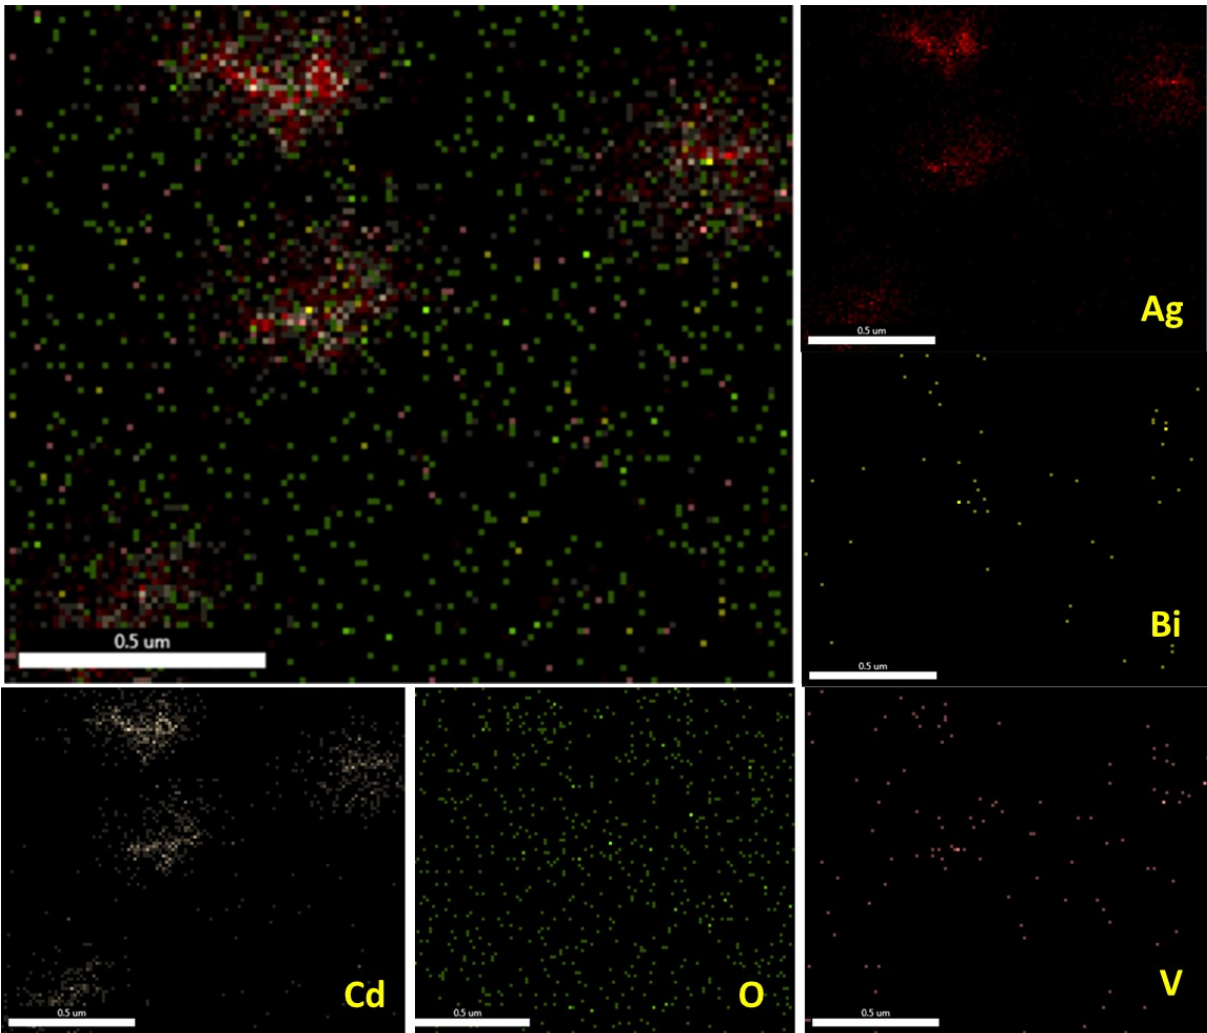

**Figure S2.** Elemental mapping of D1/10V sample.

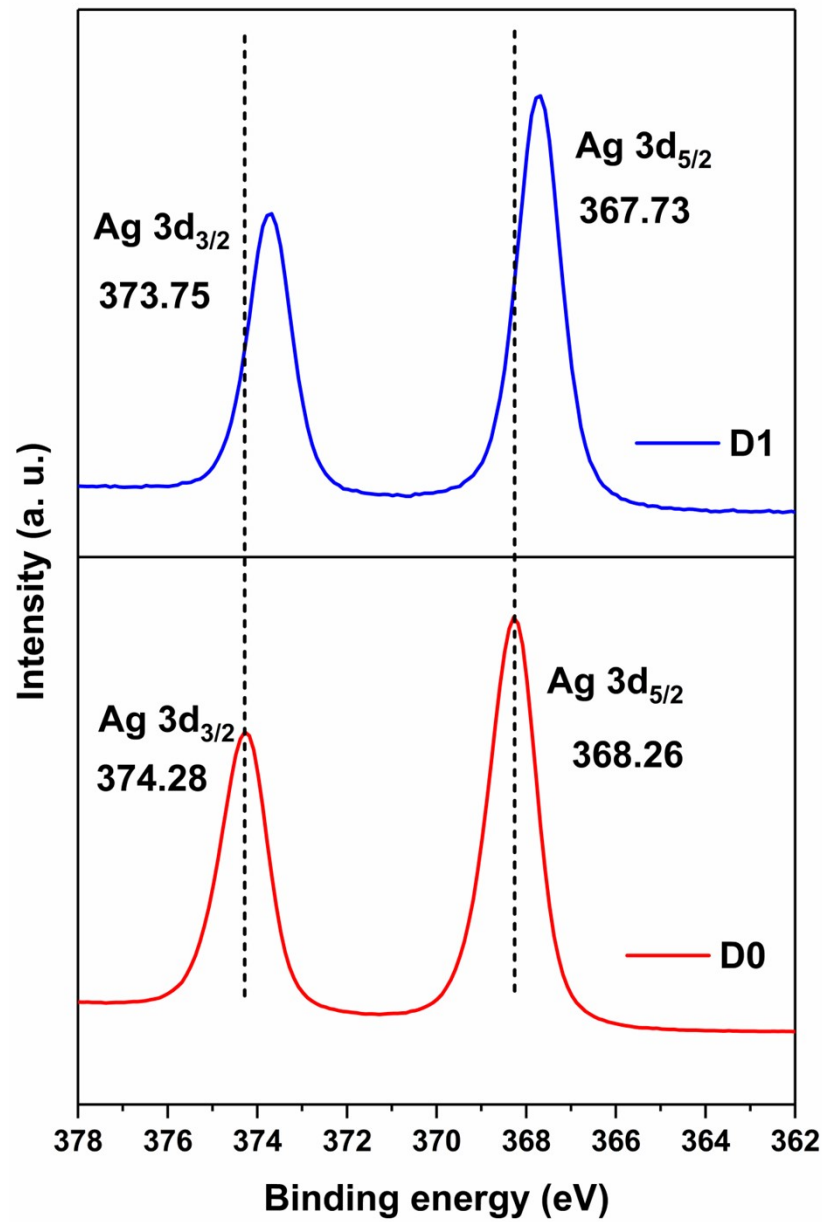

**Figure S3.** Comparison of high resolution XPS spectra of D0 and D1 samples.

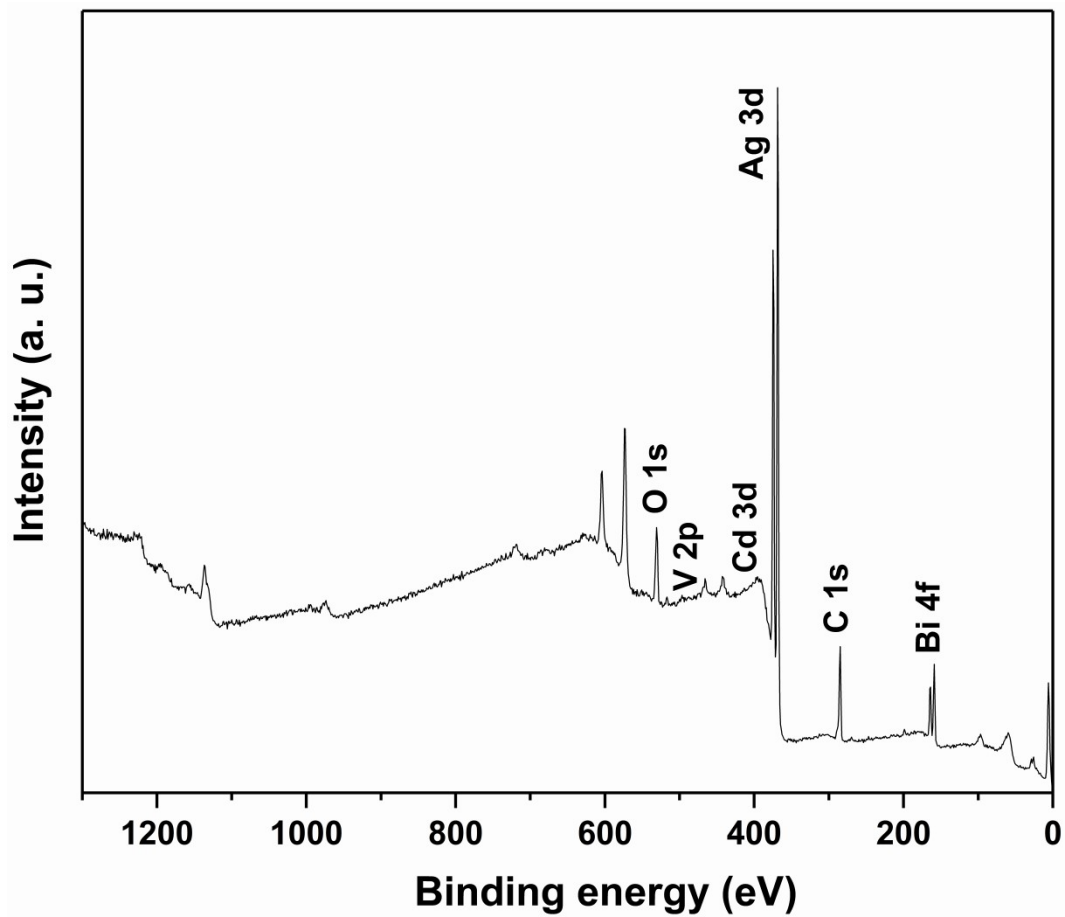

Figure S4. XPS survey spectrum of D1/10V catalyst.

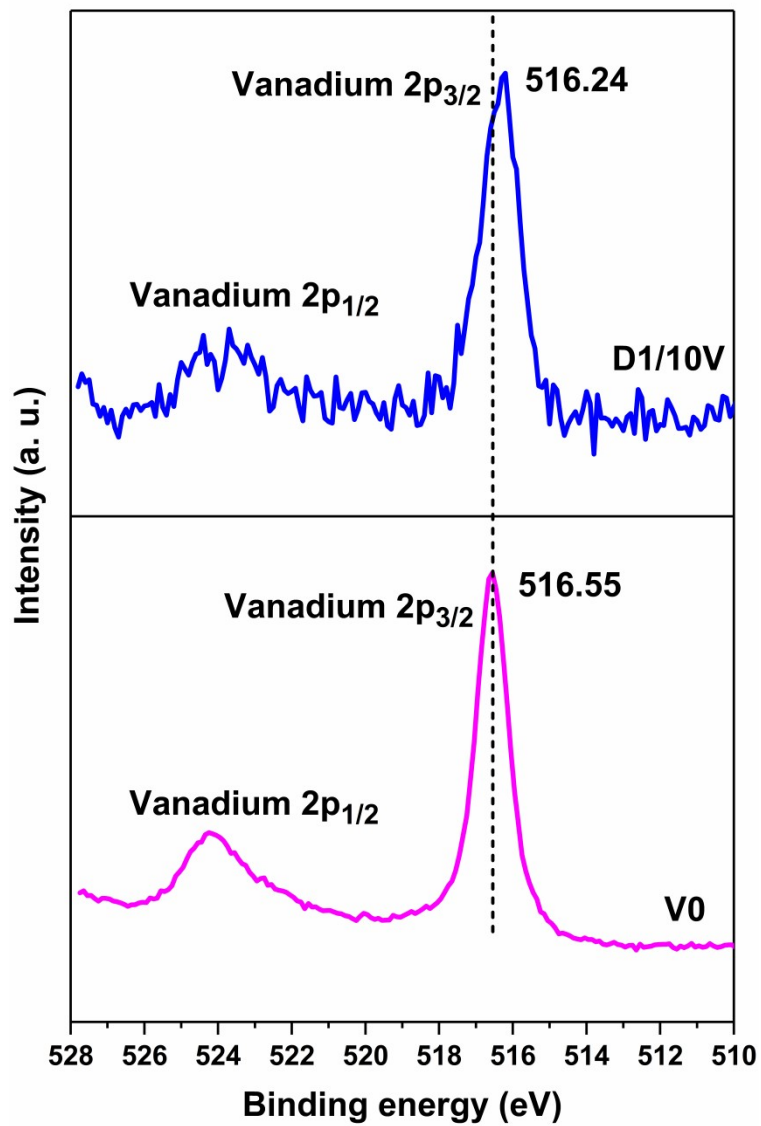

**Figure S5.** High resolution XPS of Vanadium 2p.

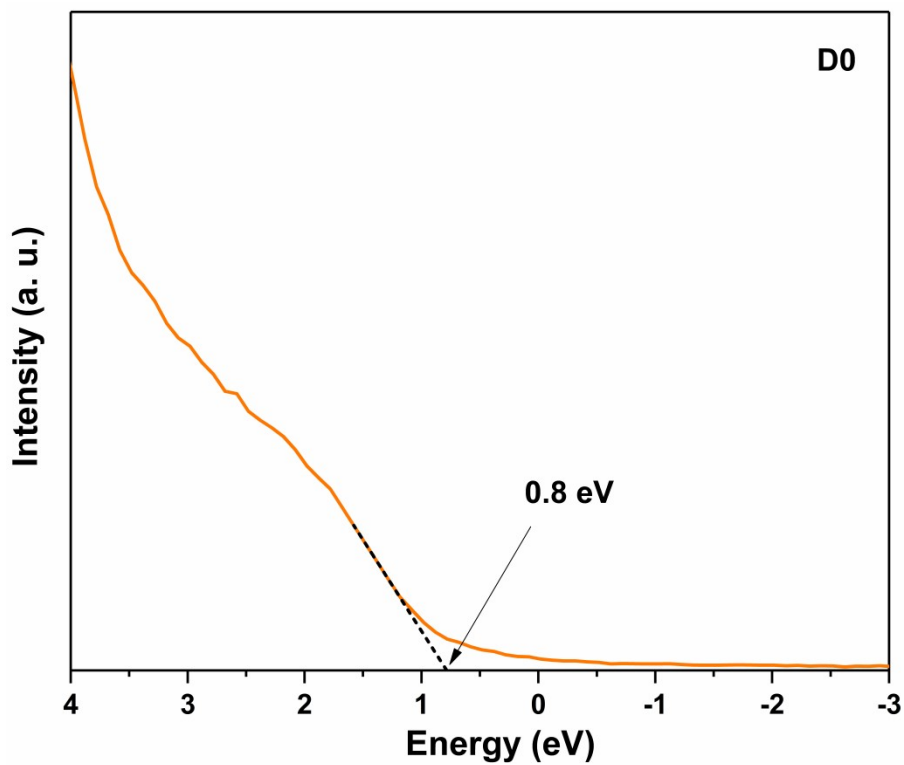

**Figure S6.** Valence band XPS spectrum of D0 sample.

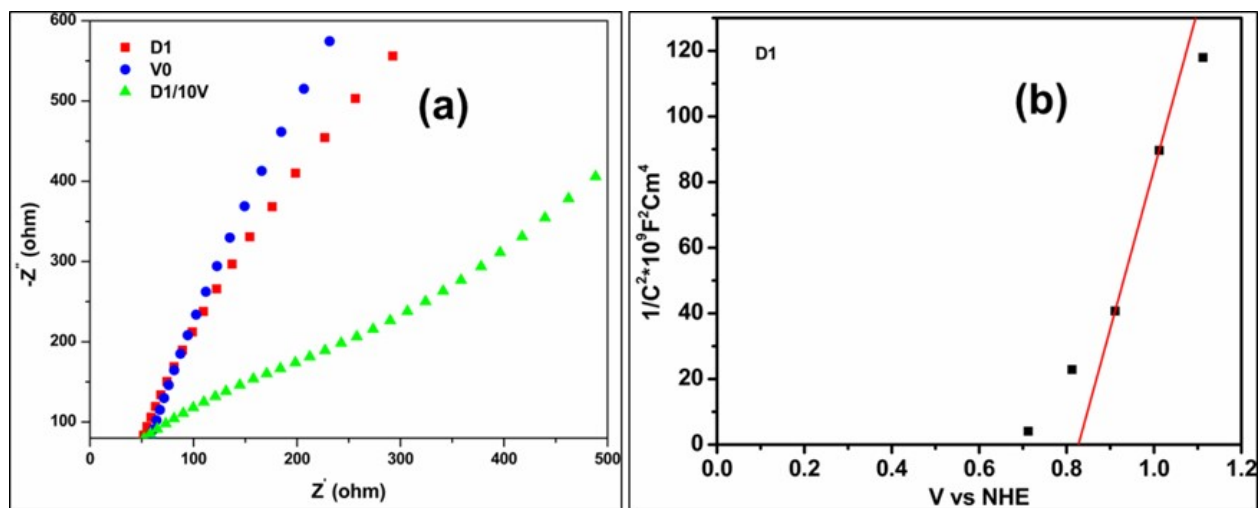

**Figure S7.** (a) Nyquist plot of D1, V0, and D1/10V photocatalysts. (b) Mott Schottky plot of Cd doped  $\text{Ag}_2\text{O}$  (D1).

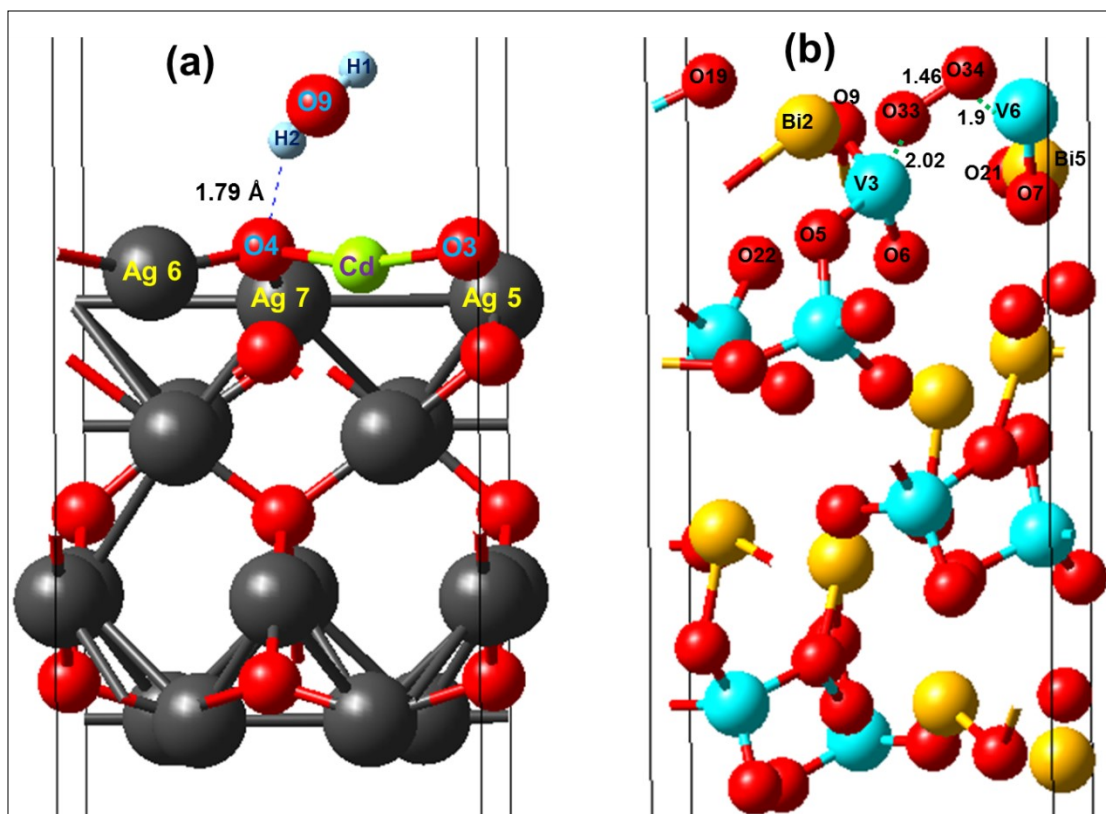

**Figure S8.** DFT calculation of (a) H<sub>2</sub>O interaction with the Cd-doped Ag<sub>2</sub>O (200) surface and (b) O<sub>2</sub> interaction with BiVO<sub>4</sub> surface.

### Turnover frequency (TOF) analysis

Although the apparent rate constant can give a comparison of photocatalytic activity, it cannot quantitatively measure the photo-efficiency. The calculation of apparent rate constant does not take into consider the catalyst amount. TOF is the best candidate for the photo-efficiency comparison, which considers the catalyst amount. The experiment for the determination of TOF was same to the photocatalytic experiments. The LED light source was in the visible spectrum range of 410-720 nm. The exact power of the irradiation light (720 W/m<sup>2</sup>) was measured using a SOLAR POWER METER (TM-206 model). The following relation calculates the TOF of the prepared photocatalysts,

$$TOF = \frac{\left[ \frac{\text{Number of moles of reactant}}{\text{Number of grams of catalyst}} \right] \times \text{Yield}}{\text{time}}$$

**Table S1.** Turn over frequency (TOF) and rate constant of synthesized catalysts for the photo-degradation of CIP.

| Catalysts     | TOF (mole g <sup>-1</sup> min <sup>-1</sup> ) | Rate constant (k <sub>app</sub> ) (min <sup>-1</sup> ) |
|---------------|-----------------------------------------------|--------------------------------------------------------|
| <b>D1</b>     | 2.25 x 10 <sup>-6</sup>                       | 5.9 x 10 <sup>-3</sup>                                 |
| <b>V</b>      | 3.17 x 10 <sup>-7</sup>                       | 0.5 x 10 <sup>-3</sup>                                 |
| <b>D1/5V</b>  | 2.06 x 10 <sup>-6</sup>                       | 5.1 x 10 <sup>-3</sup>                                 |
| <b>D1/10V</b> | 2.97 x 10 <sup>-6</sup>                       | 8.7 x 10 <sup>-3</sup>                                 |
| <b>D1/20V</b> | 7.58 x 10 <sup>-7</sup>                       | 2.6 x 10 <sup>-3</sup>                                 |
